# Supplementary material
Source: ML conference proceedings conference paper supplement (https://proceedings.neurips.cc/paper_files/paper/2019/hash/39555391eb0624a439c5131b1bb8a2e0-Abstract.html)
Supplement: Supplementary file [file 39555391eb0624a439c5131b1bb8a2e0-Supplemental.zip]

## A Omitted proofs

*Proof of Proposition 3.7.* Suppose  $F$  satisfies Assumptions 3.1 and 3.2. Fix some  $\varepsilon > 0$  and let  $m = m_F^*(\varepsilon/3)$  and  $\delta = w_m \omega_{m,F}^{-1}(\varepsilon/3)$ . Now fix some  $t \in \mathbb{Z}_+$  and consider any two  $\mathbf{u}, \mathbf{v} \in \mathcal{M}(R)$  such that

$$\max_{s \in \{0, \dots, t\}} w_{t-s} |u_s - v_s| < \delta. \quad (\text{A.1})$$

Using the same reasoning as in the proof of Theorem 3.3, we can write  $(FW_{t,m}\mathbf{u})_t = \tilde{F}_m(\mathbf{u}_{t-m:t})$  and  $(FW_{t,m}\mathbf{v})_t = \tilde{F}_m(\mathbf{v}_{t-m:t})$ , where, as before, we set  $u_s = v_s = 0$  for  $s < 0$ . From the monotonicity of  $w$  and (A.1) it follows that

$$\|\mathbf{u}_{t-m:t} - \mathbf{v}_{t-m:t}\|_\infty \leq \frac{1}{w_m} \max_{s \in \{t-m, \dots, t\}} w_{t-s} |u_s - v_s| < \omega_{m,F}^{-1}(\varepsilon/3),$$

which implies that

$$|(FW_{t,m}\mathbf{u})_t - (FW_{t,m}\mathbf{v})_t| = |\tilde{F}_m(\mathbf{u}_{t-m:t}) - \tilde{F}_m(\mathbf{v}_{t-m:t})| < \varepsilon/3.$$

Altogether, we see that (A.1) implies that

$$\begin{aligned} |(\mathbf{F}\mathbf{u})_t - (\mathbf{F}\mathbf{v})_t| &\leq |(\mathbf{F}\mathbf{u})_t - (FW_{t,m}\mathbf{u})_t| + |(FW_{t,m}\mathbf{u})_t - (FW_{t,m}\mathbf{v})_t| + |(\mathbf{F}\mathbf{v})_t - (FW_{t,m}\mathbf{v})_t| \\ &< \varepsilon/3 + \varepsilon/3 + \varepsilon/3 = \varepsilon, \end{aligned}$$

which leads to (6).

Now suppose that  $F$  has fading memory w.r.t.  $w$ . Given  $\varepsilon > 0$ , let  $\delta = \alpha_{w,F}^{-1}(\varepsilon)$  and choose any  $m \in \mathbb{Z}_+$ , such that  $w_m < \delta/R$ . If  $t < m$ , then  $\mathbf{u}_{0:t} = (W_{t,m}\mathbf{u})_{0:t}$ , and thus  $(\mathbf{F}\mathbf{u})_t = (FW_{t,m}\mathbf{u})_t$ . On the other hand, if  $t \geq m$ , then, for any  $\mathbf{u} \in \mathcal{M}(R)$ ,

$$\max_{s \in \{0, \dots, t\}} |u_s - (W_{t,m}\mathbf{u})_s| = \begin{cases} 0, & t-m \leq s \leq t \\ |u_s|, & s < t-m \end{cases}$$

and therefore, by the monotonicity of  $w$  and the choice of  $m$ ,

$$\max_{s \in \{0, \dots, t\}} w_{t-s} |u_s - (W_{t,m}\mathbf{u})_s| = \max_{s < t-m} w_{t-s} |u_s| \leq w_m \|\mathbf{u}\|_\infty < \delta,$$

which implies that  $|(\mathbf{F}\mathbf{u})_t - (FW_{t,m}\mathbf{u})_t| < \varepsilon$ . Consequently,  $m_F^*(\varepsilon) \leq m$ . Moreover, since the elements of  $w$  take values in  $(0, 1]$ , it follows from definitions that, for any  $\mathbf{u}, \mathbf{v} \in \mathcal{M}(R)$  and any  $t$ ,

$$\|\mathbf{u}_{0:t} - \mathbf{v}_{0:t}\|_\infty < \delta \implies \max_{s \in \{0, \dots, t\}} w_{t-s} |u_s - v_s| < \delta \implies |(\mathbf{F}\mathbf{u})_t - (\mathbf{F}\mathbf{v})_t| \leq \alpha_{w,F}(\delta).$$

This establishes (7).  $\square$

*Proof of Proposition 4.2.* The family of mappings  $\varphi_{s,t}^{\mathbf{u}}(\cdot)$  has the following *semiflow property*: for any input  $\mathbf{u}$  and any  $0 \leq r \leq s \leq t$ ,

$$\varphi_{r,t}^{\mathbf{u}}(\xi) = \varphi_{s,t}^{\mathbf{u}}(\varphi_{r,s}^{\mathbf{u}}(\xi)). \quad (\text{A.2})$$

By telescoping and by the semiflow property (A.2), we have

$$\begin{aligned} \varphi_{0,t}^{\mathbf{u}}(\xi) - \varphi_{0,t}^{\tilde{\mathbf{u}}}(\xi) &= \sum_{s=0}^{t-1} \left( \varphi_{s,t}^{\mathbf{u}}(\varphi_{0,s}^{\tilde{\mathbf{u}}}(\xi)) - \varphi_{s+1,t}^{\mathbf{u}}(\varphi_{0,s+1}^{\tilde{\mathbf{u}}}(\xi)) \right) \\ &= \sum_{s=0}^{t-1} \left( \varphi_{s+1,t}^{\mathbf{u}}(\varphi_{s,s+1}^{\mathbf{u}}(\varphi_{0,s}^{\tilde{\mathbf{u}}}(\xi))) - \varphi_{s+1,t}^{\mathbf{u}}(\varphi_{0,s+1}^{\tilde{\mathbf{u}}}(\xi)) \right). \end{aligned} \quad (\text{A.3})$$

Using the fact that  $\varphi_{s,s+1}^{\mathbf{u}}(\varphi_{0,s}^{\tilde{\mathbf{u}}}(\xi)) = \varphi_{s,s+1}^{\mathbf{u}}(f(\varphi_{0,s}^{\tilde{\mathbf{u}}}(\xi), u_s))$  and the stability property (9),

$$\left\| \varphi_{s+1,t}^{\mathbf{u}}(\varphi_{s,s+1}^{\mathbf{u}}(\varphi_{0,s}^{\tilde{\mathbf{u}}}(\xi))) - \varphi_{s+1,t}^{\mathbf{u}}(\varphi_{0,s+1}^{\tilde{\mathbf{u}}}(\xi)) \right\| \leq \beta(\|f(\tilde{x}_s, u_s) - f(\tilde{x}_s, \tilde{u}_s)\|, t-s-1).$$

Substituting this into (A.3), we get (10).  $\square$

*Proof of Proposition 4.14.* Since the matrix  $A$  is Schur, the function

$$g(r) := \sup_{z \in \mathbb{T}} |G(rz)| = \|G(r \cdot)\|_{\mathcal{H}_\infty(\mathbb{T})}, \quad r > \rho(A)$$

is continuous. In particular, there exists some  $r_0 \in (\rho(A), 1)$ , such that  $g(r_0) < g(1) < \gamma^{-1}$ . Consequently, the rational function

$$H(z) := \gamma G(r_0 z) = \frac{\gamma C}{r_0} \left( zI_n - \frac{A}{r_0} \right)^{-1} B$$

is well-defined for all  $z \in \mathbb{C}$  with  $|z| \geq r_0$ , and we have the following:

- $\frac{A}{r_0}$  is a Schur matrix;
- the pair  $(\frac{A}{r_0}, B)$  is controllable;
- the pair  $(\frac{A}{r_0}, \frac{\gamma C}{r_0})$  is observable;
- $\|H\|_{\mathcal{H}_\infty(\mathbb{T})} < 1$ .

Then, by the Discrete-Time Bounded-Real Lemma [Vaidyanathan, 1985], there exist real matrices  $L, W$  and a symmetric positive definite matrix  $P \in \mathbb{R}^{n \times n}$ , such that

$$A^\top P A + \gamma^2 C^\top C + r_0^2 L^\top L = r_0^2 P \quad (\text{A.4a})$$

$$B^\top P B + W^\top W = I_n \quad (\text{A.4b})$$

$$A^\top P B + r_0 L^\top W = r_0 I_n. \quad (\text{A.4c})$$

From (A.4), for any  $\theta \in \mathbb{R}$  we have

$$\begin{aligned} & (A - \theta BC)^\top P (A - \theta BC) - r_0^2 P \\ &= A^\top P A - \theta(C^\top B^\top P A + A^\top P B C) + \theta^2 C^\top B^\top P B C - r_0^2 P \\ &= (\theta^2 - \gamma^2) C^\top C - (r_0 L - \theta W C)^\top (r_0 L - \theta W C). \end{aligned}$$

Let  $\mu := r_0^2$ . Then, since  $\gamma^2 \geq \theta^2$  for all  $\theta \in [a, b]$ , it follows that

$$(A - \theta BC)^\top P (A - \theta BC) - \mu P \preceq 0, \quad a \leq \theta \leq b.$$

Since

$$\frac{\partial}{\partial x} f(x, u) = \frac{\partial}{\partial x} (Ax + B\psi(u - Cx)) = A - \psi'(u - Cx)BC$$

and  $\psi'(u - Cx) \in [a, b]$  for all  $x$  and  $u$ , the proposition is proved.  $\square$
